# Supplementary material for: In situ growth of g-C3N4/MIL-101(Fe) on iron mesh to activate persulfate for enhanced removal of methyl orange: mechanism and pathway
Source: Royal Society of Chemistry journal article supplement (doi:10.1039/d4nj01876a), 2024-01-01
Supplement: d4nj01876a1.pdf [file d4nj01876a1.pdf]

## Supplementary Materials

### **In-situ growing of heterostructure g-C<sub>3</sub>N<sub>4</sub>/MIL-101(Fe) on iron mesh for activated persulfate to removal degradation of methyl orange: Mechanism and pathway**

Zheng Zhou<sup>1</sup>, Xuemei Wang<sup>1,2\*</sup>, Pengfei Huang<sup>3</sup>, Yuan Ma<sup>1</sup>, Wei Luo<sup>1</sup>, Xinzheng Du<sup>1,2</sup>, Xiaoquan Lu<sup>1,2</sup>

<sup>1</sup>*Key Laboratory of Water Security and Water Environment Protection in Plateau Intersection, Ministry of Education, College of Chemistry and Chemical Engineering, Northwest Normal University, Lanzhou 730070, China.*

<sup>2</sup>*Key Laboratory of Bioelectrochemistry and Environmental Analysis of Gansu Province, Lanzhou 730070, China.*

<sup>3</sup>*College of Judicial Police, Gansu University of Political Science and Law, Lanzhou, 730070, China.*

---

\*Corresponding author, Tel: +86-931-7973035

E-mail address: wangxuemei@nwnu.edu.cn (X.M. Wang)

## 2.1. Chemicals and materials

1,4-benzenedicarboxylic (1, 4-H<sub>2</sub>BDC) was purchased from Tianjin Guangfu Fine Chemical Research Institute; N, N-dimethylformamide (DMF; (CH<sub>3</sub>)<sub>2</sub>NCHO) was purchased from Guangdong Guanghua Sci-Tech Co., Ltd.; Potassium Persulfate (K<sub>2</sub>S<sub>2</sub>O<sub>8</sub>) was provided by Tianjin Kaitong Chemical Reagent Co. Ltd.; Hydrochloric acid (HCl) was purchased from Shanghai Wokai Biotechnology Co., Ltd.; Ethylenediamine tetra-acetic acid disodium salt (EDTA-2Na), methyl alcohol (CH<sub>3</sub>OH), Methyl Orange (MO), *p*-benzoquinone (BQ), *t*-butanol (TBA), and methanol (MeOH) were purchased from Sinopharm Chemical Reagent Co. Ltd; Iron mesh (30 mm × 30 mm network, diameter of single iron wire = 0.14 mm), ultrapure water was used throughout the experiments.

## 2.2. Characterization

Fluorescence stereo microscopes (FSM, Leica M205 FA) and scanning electron microscopy (SEM, JSM-6701E) were used to determine the morphologies of materials. The structural was characterized by X-ray diffraction (XRD, Rigaku D/max-2400/PC), X-ray photoelectron spectroscopy (XPS, Escalab-250), and Fourier-transform infrared spectroscopy (FTIR, Digilab FTS3000). Optical properties were determined by TU-1901 ultraviolet-visible spectrophotometer and photoluminescence spectrometer (PL, Fluoro Sens 9003). UV–vis curves were obtained by UV-1750 spectrometer. Brunauer–Emmett–Teller (BET) specific surface area and pore size distribution of the samples was performed on a surface analyzer (BELSORP-max II). In order to measure transient photocurrent and electrochemical impedance (EIS), CHI-660 electrochemical workstation (Shanghai Chenhua Instrument, China) was employed. In the three-electrode detection system, Pt was used as counter electrode; Ag/AgCl (saturated KCl) was the reference electrode; 0.5 mol/L Na<sub>2</sub>SO<sub>4</sub> was used as electrolyte; 300 W model CEL-HXF300 xenon lamp was the light source. The

ESR (electron spin resonance) spectrum were acquired using a Bruker a300 spectrometer. MO degradation products were analyzed by the high resolutions mass spectrum (HRMS, Q Exactive).

**Figure S1.** a) UV-vis absorption spectra of different concentration MO. b) The standard curve of MO.

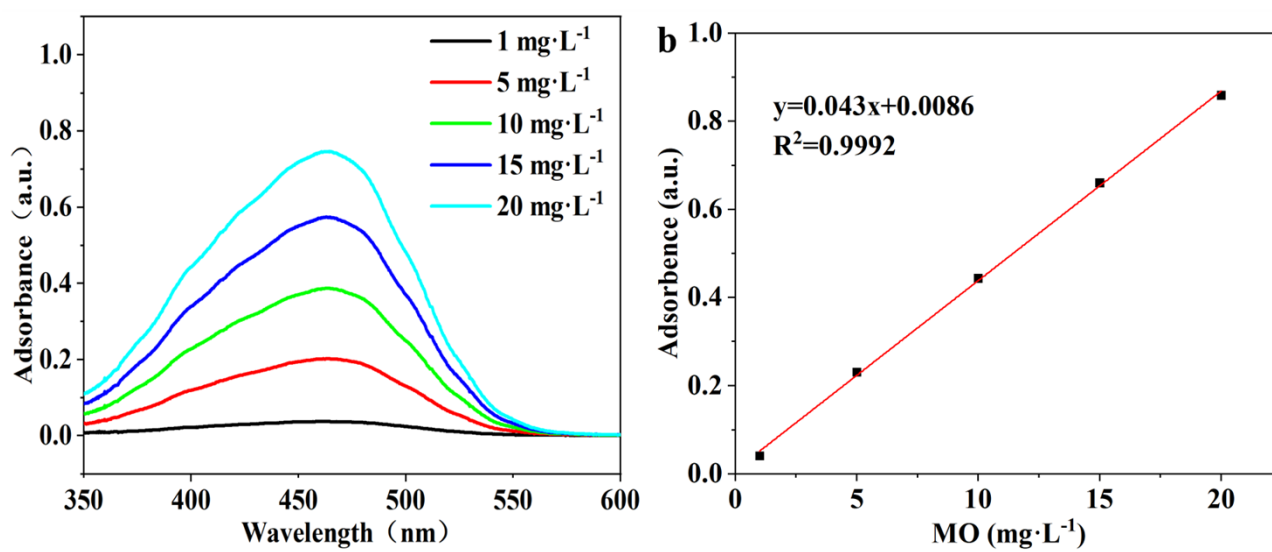

**Figure S2.** PL spectra of g-C<sub>3</sub>N<sub>4</sub>, MIL-101(Fe), and g-C<sub>3</sub>N<sub>4</sub>/MIL-101(Fe)

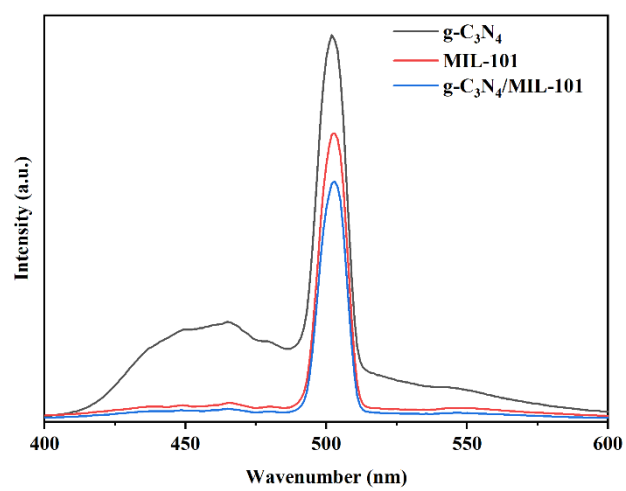

**Figure S3.** N<sub>2</sub> adsorption/desorption isotherms and pore size distribution plot of g-C<sub>3</sub>N<sub>4</sub> (a), MIL-101(Fe) (b).

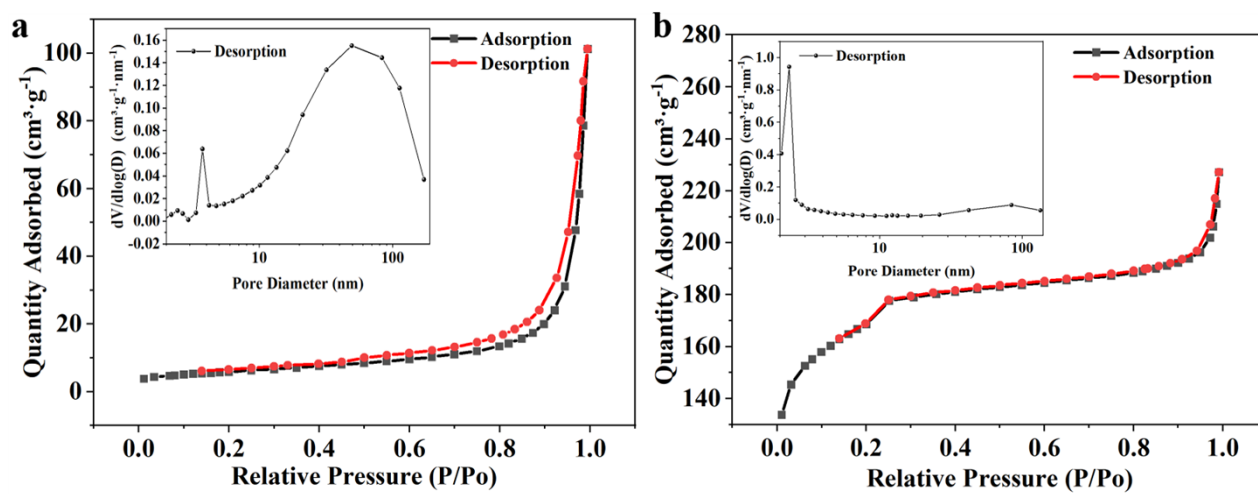

**Figure S4.** The influence of visible light on the degradation of MO.

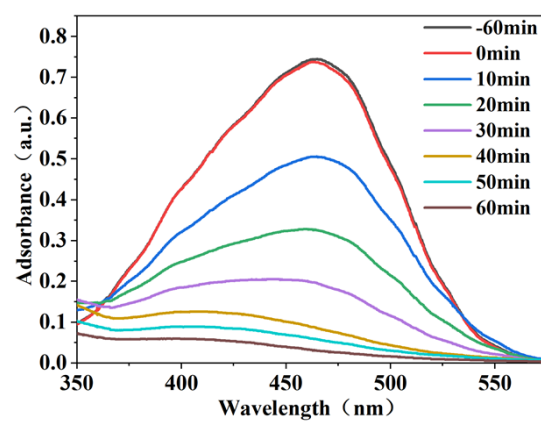

**Figure S5.** MS of MO solution at different reaction time

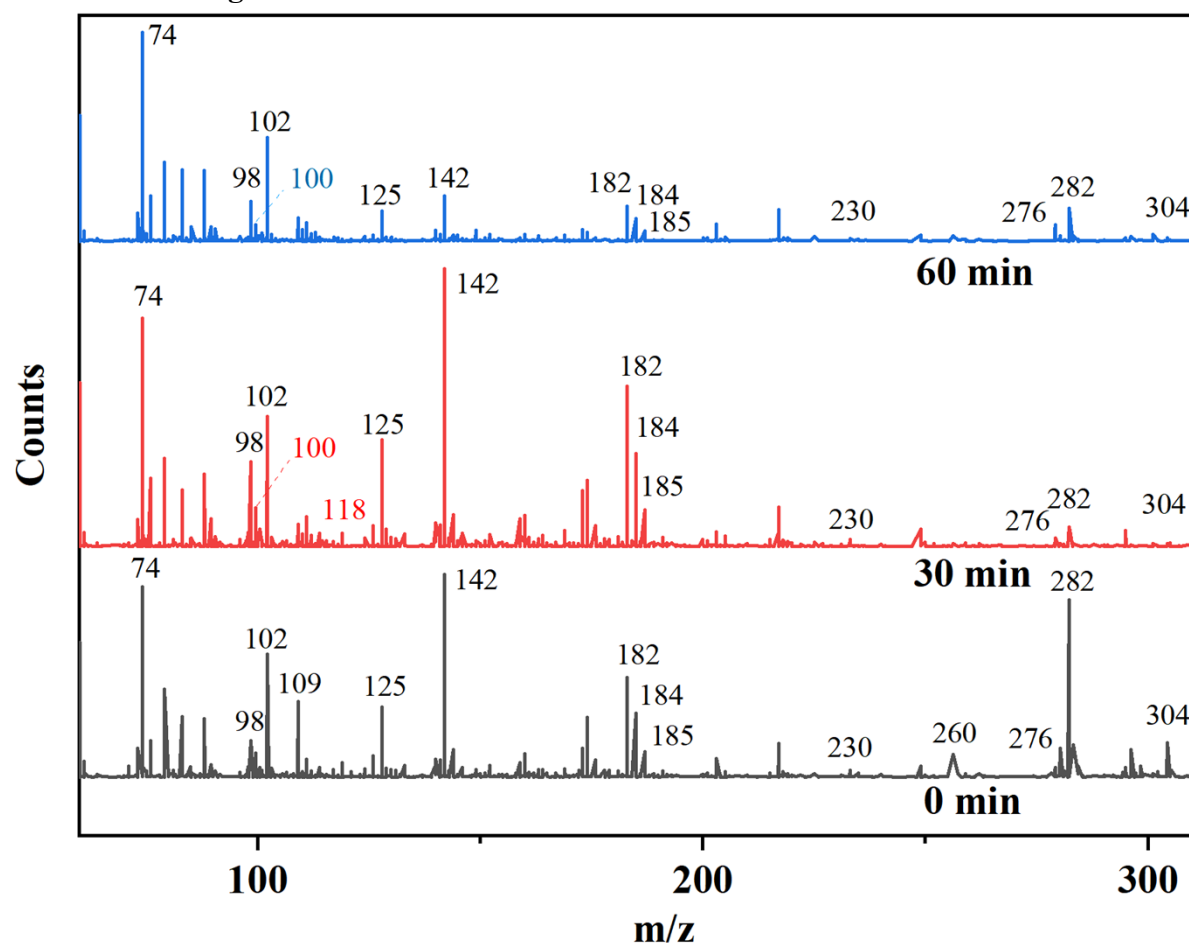

**Table S1** The BET specific surface ( $S_{\text{BET}}$ ), pore volume ( $V_p$ ), and pore size (D) of MIL-101(Fe) and g- $\text{C}_3\text{N}_4$ .

| Samples                   | $S_{\text{BET}}$ ( $\text{m}^2/\text{g}$ ) | $V_p$ ( $\text{cm}^3/\text{g}$ ) | D (nm) <sup>a</sup> |
|---------------------------|--------------------------------------------|----------------------------------|---------------------|
| g- $\text{C}_3\text{N}_4$ | 21.03                                      | 0.157                            | 24.8/28.9           |
| MIL-101(Fe)               | 600.57                                     | 0.170                            | 3.8/4.1             |

<sup>a</sup> The pore diameters were calculated from the adsorption/desorption branch of the isotherm using the BJH method.

**Table S2.** HRMS analysis results of MO photocatalytic degradation products

| Abbreviation    | m/z | Possible structure                                                                    |
|-----------------|-----|---------------------------------------------------------------------------------------|
| MO <sup>-</sup> | 304 | 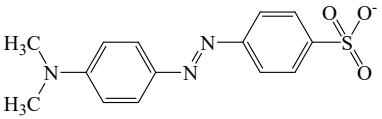    |
| A               | 276 | 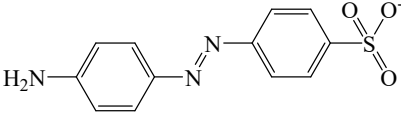    |
| B               | 260 | 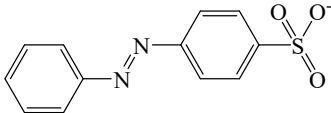    |
| C               | 230 | 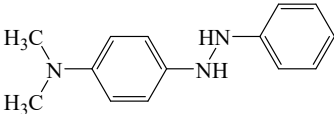    |
| D               | 185 | 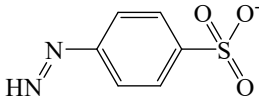    |
| E               | 184 | 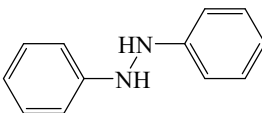   |
| F               | 182 | 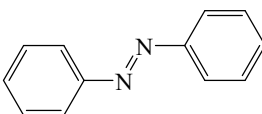  |
| G               | 142 | 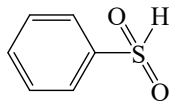 |
| H               | 125 | 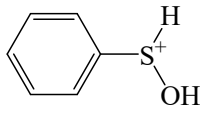  |
| I               | 109 | 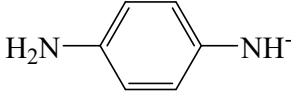  |
| J               | 102 | 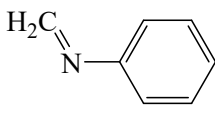  |
| K               | 118 | 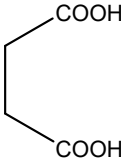 |
| L               | 100 | 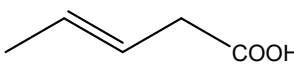  |
